# Supplementary material
Source: publisher figshare collection journal article supplement (https://acs.figshare.com/ndownloader/files/35683314)
Supplement: Supplementary file 1 [file 35683314]

## Supporting Information

### MgAl-Layered Double Hydroxide Nanoparticles as Smart Nanofillers to Control the Rheological Properties and the Residual Porosity of Cement-Based Materials

Adriana A. Almeida<sup>a</sup>; Rodrigo M. M. Santos<sup>a</sup>; Marinalva A. Alves Rosa<sup>a</sup>; Sandra H. Pulcinelli<sup>a</sup>; Vanderley M. John<sup>b</sup>; Celso V. Santilli<sup>a</sup>

<sup>a</sup>. São Paulo State University (UNESP), Institute of Chemistry, 14800-060, Araraquara, SP, Brazil.

<sup>b</sup>. Polytechnic School of the University of São Paulo, 05508-900 São Paulo, SP, Brazil.

\*Corresponding author: Celso Valentim Santilli, Instituto de Química-UNESP, Rua Prof. Francisco Degni 55, 14800-060, Araraquara/SP, Brazil Tel.: +55 16 3301-9645. E-mail address: cv.santilli@unesp.br

## EXPERIMENTAL

Table S1. Chemical composition of the cement (wt.%).

| Component                      | wt. % |
|--------------------------------|-------|
| CaO                            | 59.7  |
| SiO <sub>2</sub>               | 19.1  |
| Al <sub>2</sub> O <sub>3</sub> | 4.5   |
| Fe <sub>2</sub> O <sub>3</sub> | 2.6   |
| SO <sub>3</sub>                | 3.0   |
| MgO                            | 1.3   |
| Na <sub>2</sub> O              | 0.3   |
| K <sub>2</sub> O               | 0.9   |
| TiO <sub>2</sub>               | 0.2   |

Table S2. Ionic species composition of the cement pore solution (determined by ion chromatography).

| <b>Component</b> | <b>Concentration (g/L)</b> |
|------------------|----------------------------|
| Carbonate        | 0.5                        |
| Chloride         | 1.45                       |
| Calcium          | 0.66                       |
| Sodium           | 0.38                       |
| Magnesium        | 0.0002                     |
| Potassium        | 2.34                       |
| Sulfate          | 4.20                       |

## RESULTS AND DISCUSSION

Table S3. Basal distances and average crystallite sizes for the different samples.

| <b>Sample</b> | <b>d (nm)</b> | <b>Average crystallite size (nm)</b> |
|---------------|---------------|--------------------------------------|
| LDH           | 0.761         | 30.8                                 |
| RLDH-W        | 0.766         | 10.7                                 |
| RLDH-C        | 0.766         | 10.9                                 |

Table S4. Texture parameters obtained by mercury porosimetry and N<sub>2</sub> adsorption-desorption isotherms for the cement specimens prepared with different contents of MO (0, 0.5, 1.0, and 2.0 wt.%).

| <b>MO content (wt. %)</b> | <b>Capillary pores volume (cm<sup>3</sup> g<sup>-1</sup>)</b> | <b>Gel pores volume (cm<sup>3</sup> g<sup>-1</sup>)</b> | <b>Average capillary pore size (μm)</b> | <b>Average gel pore size (μm)</b> | <b>Pores area (m<sup>2</sup> g<sup>-1</sup>)</b> | <b>S<sub>BET</sub> (m<sup>2</sup> g<sup>-1</sup>)</b> |
|---------------------------|---------------------------------------------------------------|---------------------------------------------------------|-----------------------------------------|-----------------------------------|--------------------------------------------------|-------------------------------------------------------|
| 0                         | 0.0138                                                        | 0.0482                                                  | 0.140                                   | 0.0113                            | 21                                               | 60                                                    |
| 0.5                       | 0.0124                                                        | 0.0418                                                  | 0.140                                   | 0.0114                            | 19                                               | 45                                                    |
| 1.0                       | 0.0120                                                        | 0.0452                                                  | 0.125                                   | 0.0133                            | 19                                               | 36                                                    |
| 2.0                       | 0.0086                                                        | 0.0408                                                  | 0.113                                   | 0.0105                            | 18                                               | 39                                                    |

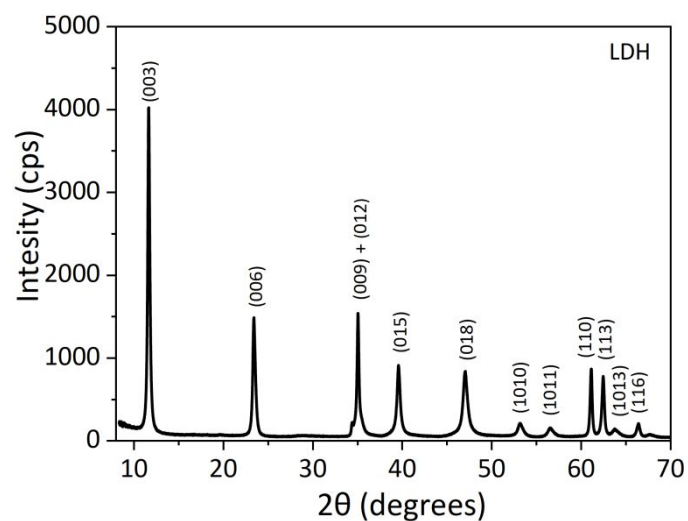

Fig. S1. XRD pattern of the layered double hydroxide (LDH).

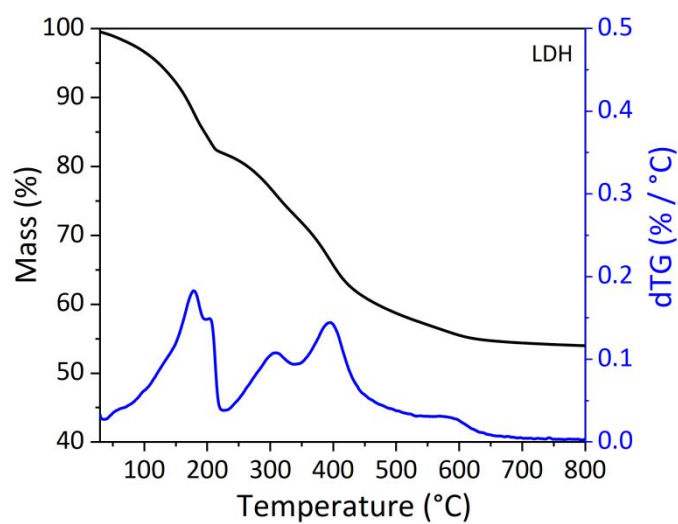

Fig. S2. Thermogravimetric analysis of the LDH sample.

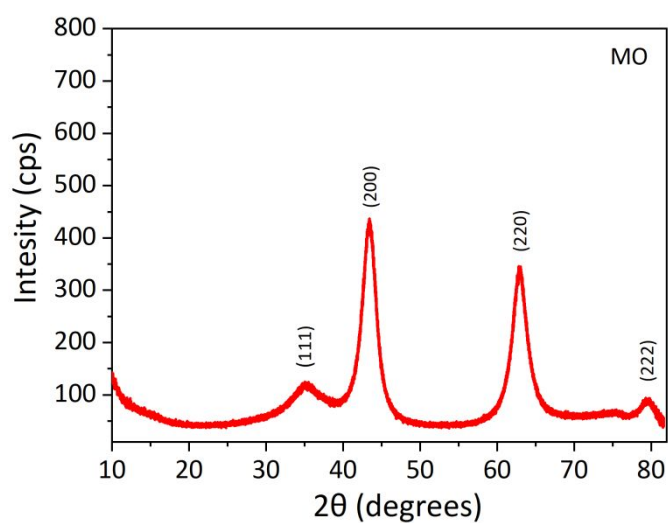

Fig. S3. X-ray diffractogram of the MO sample obtained by calcination of LDH at 500 °C, under an air atmosphere.

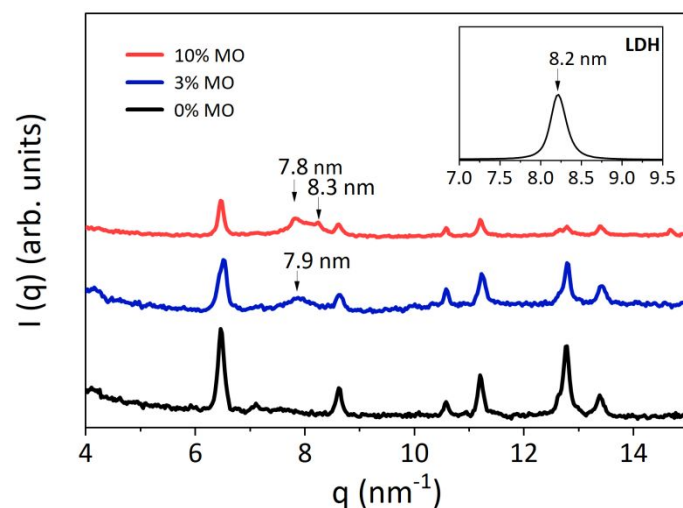

Fig. S4. WAXS pattern of the cement samples containing 0, 3, and 10 wt.% of MO, after hydration for 3 days. The inset shows the peak for the pure LDH.

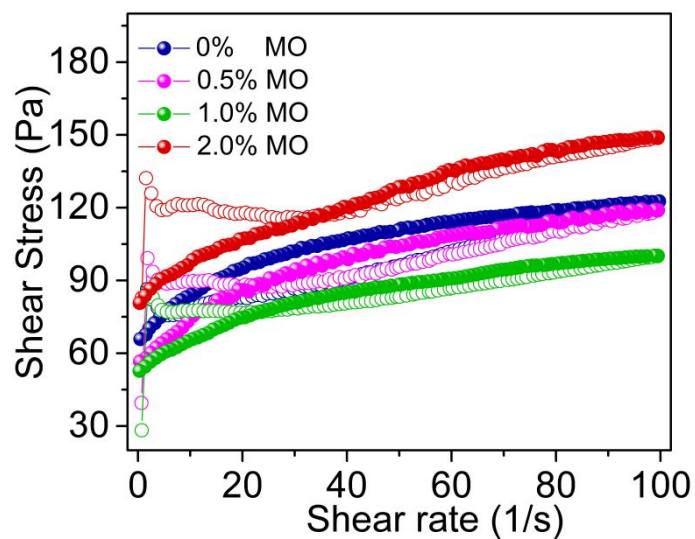

Fig. S5: Second cycle of flow test for the different cement paste formulations, with acceleration (open symbols) and deceleration (closed symbols) curves.

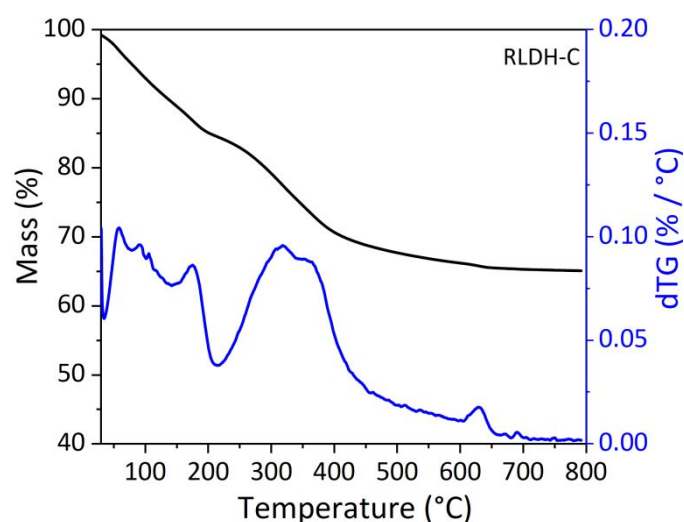

Fig. S6. Thermogravimetric analysis of the RLDH-C sample after 3 h of regeneration.

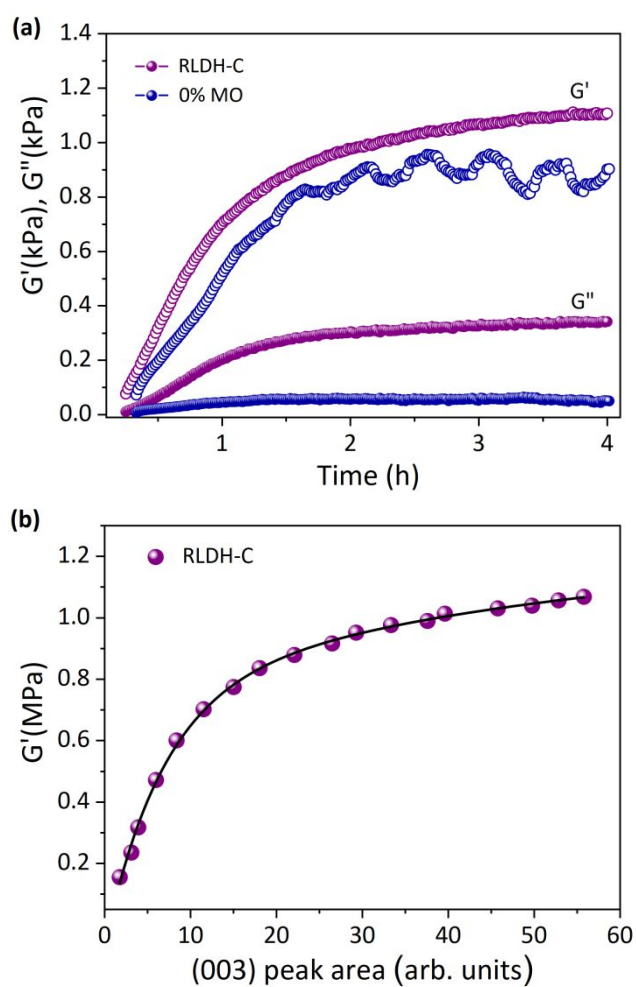

Fig. S7. (a) Elastic ( $G'$ ) and viscous ( $G''$ ) components, as a function of time, for the MO during regeneration, and for the cement paste without MO. (b) Elastic component ( $G'$ ) for the RLDH-C, as a function of the (003) peak diffraction area obtained by WAXS analysis.

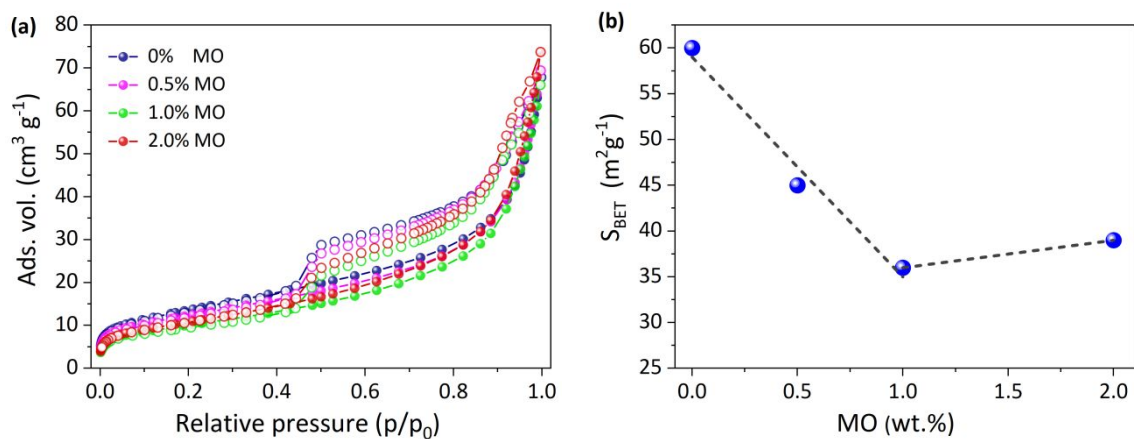

Fig. S8. (a) N<sub>2</sub> adsorption-desorption isotherms and (b) BET area for the hydrated cement specimens prepared with different contents of MO (0, 0.5, 1.0, and 2.0 wt.%).
